# Supplementary material for: The heterogeneity and complexity of Cannabis extracts as antitumor agents
Source: PubMed Central journal article supplement (PMC6609248; doi:10.18632/oncotarget.26983), 2019-06-25
Supplement: oncotarget-10-4091-s001.pdf [file oncotarget-10-4091-s001.pdf]

## The heterogeneity and complexity of *Cannabis* extracts as antitumor agents

### SUPPLEMENTARY MATERIALS

#### PHYTOCANNABINOID EXTRACTION AND SAMPLE PREPARATION

*Cannabis* plant samples were ground to a fine powder using an electrical grinder. Prior to phytocannabinoid extraction, several of the flowers underwent heat-decarboxylation in an oven at 120 °C for 1 h. Approximately 5 g of the natural or decarboxylated flowers were accurately weighed and extracted with 50 ml ethanol. Samples were sonicated in an ultrasonic bath for 30 min and then agitated in an orbital shaker at 25 °C for 15 min. Samples were then filtered under pressure through Whatman filter paper number 4 and the ethanol was evaporated under reduced pressure at 38 °C using a rotary evaporator (Laborata 4000; Heidolph Instruments GmbH & Co. KG; Germany).

#### PHYTOCANNABINOID IDENTIFICATION AND QUANTIFICATION

Phytocannabinoid analyses were performed using a Thermo Scientific ultra-high-performance liquid chromatography (UHPLC) system coupled with a Q Exactive™ Focus Hybrid Quadrupole-Orbitrap MS (Thermo Scientific, Bremen, Germany). The chromatographic separation was achieved using a Halo C18 Fused Core column (2.7 µm, 150 mm × 2.1 mm i.d.) with a guard column (2.7 µm, 5 mm × 2.1 mm i.d.) (Advanced Materials Technology, Delaware, USA) and a ternary A/B/C multistep gradient (solvent A: 0.1 % acetic acid in Milli Q water, solvent B: 0.1% acetic acid in acetonitrile, and solvent C: methanol, all solvents were

of LC/MS grade). The multistep gradient program was established as follows: initial conditions were 50% B raised to 67% B until 3 min, held at 67% B for 5 min, and then raised to 90% B until 12 min, held at 90 % B until 15 min, decreased to 50% B over the next min, and held at 50 % B until 20 min for re-equilibration of the system prior to the next injection. Solvent C was initially 5% and then lowered to 3% until 3 min, held at 3 % until 8 min, raised to 5 % until 12 min and then kept constant at 5 % throughout the run. A flow rate of 0.25 ml/min was used, the column temperature was 30 °C and the injection volume was 1 µL. MS acquisition was carried out with a heated electro spray ionization (HESI-II) ion source operated in negative mode. Source parameters were as follows: sheath gas flow rate, auxiliary gas flow rate and sweep gas flow rate: 50, 20 and 0 arbitrary units respectively; capillary temperature: 350 °C; heater temperature: 50 °C; spray voltage: 3.00 kV. The scan range was 150–550 m/z for all acquisition events. MS was operated in full MS<sup>1</sup> mode at 70,000 resolution, and the AGC target was set to 10<sup>6</sup> with a maximum IT of 100 ms.

#### POLYMERASE CHAIN REACTION (PCR) ANALYSIS

mRNA expression levels of the human CNR2 gene (CB2) were quantified in 50 ng cDNA using Red Load Taq Master PCR assay. PCR amplification was performed using the following primers: Forward: atggaggaatgctgggtgacagaga Reverse: gcaatcagagaggtct agatctctggaatct. Results were visualized using 1.2% gel electrophoresis.

|                         | CAN6       | CAN4    | CAN11   | CAN7    | CAN5    | CAN12   | CAN2    | CAN9    | CAN3    | CAN8    | CAN1    | CAN10   |         |             |           |
|-------------------------|------------|---------|---------|---------|---------|---------|---------|---------|---------|---------|---------|---------|---------|-------------|-----------|
| A <sup>+</sup> -THCtype | THCA       | 55.0065 | 48.0668 | 29.9010 | 0.0000  | 0.3049  | 0.2170  | 0.0000  | 0.0000  | 0.0000  | 1.1003  | 16.6407 | 0.0000  | C - %w/w    |           |
|                         | THC        | 6.1633  | 15.9636 | 1.7548  | 67.8032 | 56.5847 | 35.1295 | 25.9923 | 2.3489  | 1.4977  | 0.0000  | 3.1207  | 0.0000  | C<0.02      |           |
|                         | THCA-C4    | 0.3514  | 0.2030  | 0.1169  | 0.0000  | 0.0000  | 0.0000  | 0.0000  | 0.0000  | 0.0000  | 0.0000  | 0.0665  | 0.0000  | 0.02<C<0.1% |           |
|                         | THC-C4     | 0.0000  | 0.0000  | 0.0000  | 0.1969  | 0.1085  | 0.0000  | 0.0000  | 0.0000  | 0.0000  | 0.0000  | 0.0000  | 0.0000  | 0.0000      | 0.1%<C<1% |
|                         | THCVA      | 1.1172  | 0.3818  | 0.3895  | 0.0000  | 0.0000  | 0.0000  | 0.0000  | 0.0000  | 0.0000  | 0.0360  | 0.1295  | 0.0000  | 0.0000      | 1%<C<10%  |
|                         | THCV       | 0.0000  | 0.0000  | 0.0000  | 0.6137  | 0.2072  | 0.2246  | 0.0000  | 0.0000  | 0.0000  | 0.0000  | 0.0000  | 0.0000  | 0.0000      | 10%<C<30% |
|                         | THCOA      | 0.2371  | 0.3631  | 0.0676  | 0.0000  | 0.0000  | 0.0000  | 0.0000  | 0.0000  | 0.0000  | 0.0000  | 0.1178  | 0.0000  | 0.0000      | C>30%     |
| THCMA                   | 0.0617     | 0.0896  | 0.0297  | 0.0000  | 0.0000  | 0.0000  | 0.0000  | 0.0000  | 0.0000  | 0.0000  | 0.0351  | 0.0000  | 0.0000  |             |           |
| CBDtype                 | CBDA       | 0.1922  | 0.2139  | 0.0787  | 0.0000  | 0.0000  | 0.0093  | 0.1294  | 6.2145  | 0.0249  | 42.4938 | 31.1696 | 0.0848  |             |           |
|                         | CBD        | 0.0000  | 0.0000  | 0.0000  | 0.2107  | 0.2125  | 0.0776  | 35.8411 | 55.5851 | 27.1263 | 4.4839  | 1.8886  | 0.8097  |             |           |
|                         | CBDA-C4    | 0.0000  | 0.0000  | 0.0000  | 0.0000  | 0.0015  | 0.0000  | 0.0023  | 0.0206  | 0.0000  | 0.1345  | 0.0466  | 0.0000  |             |           |
|                         | CBD-C4     | 0.0000  | 0.0000  | 0.0000  | 0.0000  | 0.0000  | 0.0000  | 0.0564  | 0.1803  | 0.0521  | 0.0172  | 0.0000  | 0.0000  |             |           |
|                         | CBDVA      | 0.0014  | 0.0000  | 0.0000  | 0.0000  | 0.0000  | 0.0000  | 0.0000  | 0.0701  | 0.0000  | 0.4627  | 0.0433  | 0.0000  |             |           |
|                         | CBDV       | 0.0000  | 0.0000  | 0.0000  | 0.0000  | 0.0000  | 0.0000  | 0.0589  | 0.7227  | 0.1896  | 0.0573  | 0.0000  | 0.0210  |             |           |
|                         | CBDOA      | 0.0000  | 0.0000  | 0.0000  | 0.0000  | 0.0000  | 0.0000  | 0.0000  | 0.0085  | 0.0000  | 0.0307  | 0.0085  | 0.0000  |             |           |
| CBGtype                 | CBGA       | 12.7114 | 4.4696  | 0.3930  | 0.2240  | 0.0725  | 0.0739  | 0.0000  | 0.1960  | 0.0000  | 0.8667  | 1.1989  | 0.0196  |             |           |
|                         | CBG        | 0.8920  | 0.6684  | 0.1866  | 12.6179 | 4.4623  | 0.5928  | 1.8095  | 1.7364  | 1.9181  | 0.3457  | 0.1926  | 54.6694 |             |           |
|                         | CBGA-C4    | 0.0192  | 0.0222  | 0.0026  | 0.0362  | 0.0408  | 0.0114  | 0.0131  | 0.0000  | 0.0000  | 0.0034  | 0.0032  | 0.0000  |             |           |
|                         | CBG-C4     | 0.0000  | 0.0000  | 0.0000  | 0.0094  | 0.0000  | 0.0000  | 0.0000  | 0.0000  | 0.0000  | 0.0000  | 0.0000  | 0.1466  |             |           |
|                         | CBGV       | 0.0000  | 0.0000  | 0.0000  | 0.0071  | 0.0000  | 0.0000  | 0.0000  | 0.0000  | 0.0000  | 0.0000  | 0.0000  | 0.8819  |             |           |
|                         | CBGO       | 0.0000  | 0.0000  | 0.0000  | 0.0000  | 0.0000  | 0.0000  | 0.0000  | 0.0000  | 0.0000  | 0.0000  | 0.0000  | 0.0651  |             |           |
|                         | Sesqui-CBG | 0.0130  | 0.0277  | 0.0110  | 0.0160  | 0.0310  | 0.0187  | 0.0273  | 0.0374  | 0.0350  | 0.0173  | 0.0161  | 0.0358  |             |           |
| CBE/CEN type            | CBCA       | 0.3390  | 0.4440  | 0.1316  | 0.0061  | 0.0060  | 0.0252  | 0.0031  | 0.0763  | 0.0000  | 0.6815  | 0.6925  | 0.0000  |             |           |
|                         | CBC        | 0.0749  | 0.2113  | 0.0163  | 0.8269  | 1.0927  | 0.3350  | 1.9335  | 2.4134  | 1.5208  | 0.1785  | 0.1491  | 0.7137  |             |           |
|                         | CBCVA      | 0.0042  | 0.0000  | 0.0000  | 0.0000  | 0.0000  | 0.0000  | 0.0000  | 0.0031  | 0.0000  | 0.0277  | 0.0037  | 0.0000  |             |           |
|                         | CBCV       | 0.0000  | 0.0000  | 0.0000  | 0.0000  | 0.0000  | 0.0000  | 0.0000  | 0.0880  | 0.0255  | 0.0000  | 0.0000  | 0.0417  |             |           |
|                         | CBNA       | 0.7241  | 1.3076  | 0.4984  | 0.0000  | 0.0121  | 0.0000  | 0.0000  | 0.0000  | 0.0000  | 0.0488  | 0.2313  | 0.0000  |             |           |
|                         | CBN        | 0.0417  | 0.3022  | 0.0171  | 1.0339  | 2.7877  | 0.3699  | 1.0495  | 0.0830  | 1.5111  | 0.0143  | 0.0252  | 0.0000  |             |           |
|                         | CBEA       | 0.0109  | 0.0105  | 0.0000  | 0.0000  | 0.0000  | 0.0000  | 0.0000  | 0.0362  | 0.0000  | 0.1430  | 0.0837  | 0.0000  |             |           |
| CBE                     | 0.0000     | 0.0000  | 0.0000  | 0.0000  | 0.0000  | 0.0000  | 0.2917  | 0.2958  | 0.9250  | 0.0156  | 0.0000  | 0.0543  |         |             |           |
| CBTtype                 | CBNDA      | 0.0000  | 0.0000  | 0.0000  | 0.0000  | 0.0000  | 0.0000  | 0.0000  | 0.0043  | 0.0000  | 0.0651  | 0.0296  | 0.0000  |             |           |
|                         | CBL        | 0.0000  | 0.0000  | 0.0000  | 0.0000  | 0.0458  | 0.0000  | 0.0582  | 0.0386  | 0.0848  | 0.0000  | 0.0000  | 0.0444  |             |           |
|                         | CBTA-1     | 1.5635  | 1.2756  | 1.8236  | 0.0000  | 0.0166  | 0.0037  | 0.0000  | 0.0000  | 0.0000  | 0.0466  | 0.3494  | 0.0000  |             |           |
|                         | CBT-1      | 1.0314  | 2.6370  | 0.6330  | 3.3258  | 4.1060  | 1.8548  | 1.2396  | 0.2518  | 0.7204  | 0.1128  | 0.3086  | 0.0000  |             |           |
|                         | CBTV-1     | 0.0000  | 0.0000  | 0.0000  | 0.0295  | 0.0000  | 0.0000  | 0.0000  | 0.0000  | 0.0000  | 0.0000  | 0.0000  | 0.0000  |             |           |
|                         | CBTA-3     | 0.4617  | 0.2567  | 0.3411  | 0.0000  | 0.0087  | 0.0000  | 0.0000  | 0.0000  | 0.0000  | 0.0612  | 0.0935  | 0.0000  |             |           |
|                         | CBT-3      | 0.1403  | 0.4385  | 0.0731  | 1.6640  | 2.6390  | 0.5477  | 0.7158  | 0.0948  | 0.3649  | 0.0344  | 0.0572  | 0.0000  |             |           |
|                         | CBT-2      | 0.0000  | 0.0215  | 0.0000  | 0.0000  | 0.0000  | 0.0000  | 0.0607  | 0.0484  | 0.0000  | 0.0000  | 0.0000  | 0.0000  |             |           |
|                         | 329-11a    | 0.0000  | 0.0000  | 0.0000  | 0.0000  | 0.0000  | 0.0000  | 0.0554  | 0.2582  | 0.0523  | 0.0276  | 0.0000  | 0.0000  |             |           |
|                         | 329-11b    | 0.0000  | 0.0139  | 0.0169  | 0.1524  | 0.1491  | 0.2630  | 0.1943  | 0.0550  | 0.1050  | 0.0000  | 0.0247  | 0.0277  |             |           |
|                         | 329-11c    | 0.0000  | 0.0000  | 0.0000  | 0.0170  | 0.0000  | 0.0000  | 0.0737  | 0.1308  | 0.0000  | 0.0330  | 0.0000  | 0.0187  |             |           |
|                         | 329-11d    | 0.1285  | 0.5413  | 0.1145  | 0.7637  | 1.1899  | 0.3622  | 0.2969  | 0.0424  | 0.0789  | 0.0190  | 0.0703  | 0.0000  |             |           |
|                         | 329-11e    | 0.0000  | 0.0000  | 0.0000  | 0.0554  | 0.0843  | 0.0176  | 0.0368  | 0.0000  | 0.0000  | 0.0000  | 0.0000  | 0.0000  |             |           |
|                         | 373-12a    | 0.0000  | 0.0000  | 0.0000  | 0.0000  | 0.0000  | 0.0000  | 0.0000  | 0.0100  | 0.0000  | 0.0455  | 0.0088  | 0.0000  |             |           |
| 373-12b                 | 0.0234     | 0.0276  | 0.0807  | 0.0000  | 0.0000  | 0.0000  | 0.0000  | 0.0035  | 0.0000  | 0.0413  | 0.0630  | 0.0000  |         |             |           |
| 373-12c                 | 0.0297     | 0.0452  | 0.0124  | 0.0000  | 0.0000  | 0.0000  | 0.0000  | 0.0000  | 0.0000  | 0.0000  | 0.0000  | 0.0000  |         |             |           |
| 327-13a                 | 0.0000     | 0.0000  | 0.0000  | 0.0000  | 0.0000  | 0.0000  | 0.1053  | 0.7707  | 0.0314  | 0.0000  | 0.0000  | 0.0000  |         |             |           |
| 327-13b                 | 0.0000     | 0.0000  | 0.0000  | 0.0000  | 0.0000  | 0.0000  | 0.0157  | 0.1360  | 0.0317  | 0.0146  | 0.0000  | 0.0000  |         |             |           |
| 327-13c                 | 0.0000     | 0.0000  | 0.0000  | 0.0000  | 0.0000  | 0.0000  | 0.2999  | 0.2335  | 0.1199  | 0.2178  | 0.0772  | 0.0000  |         |             |           |
| 371-14a                 | 0.0000     | 0.0000  | 0.0000  | 0.0000  | 0.0000  | 0.0000  | 0.0000  | 0.0331  | 0.0000  | 0.0341  | 0.0030  | 0.0000  |         |             |           |
| 371-14b                 | 0.1078     | 0.1063  | 0.0815  | 0.0000  | 0.0000  | 0.0000  | 0.0000  | 0.0000  | 0.0000  | 0.0046  | 0.0193  | 0.0000  |         |             |           |
| 417-15a                 | 0.0467     | 0.0585  | 0.0626  | 0.0000  | 0.0000  | 0.0000  | 0.0000  | 0.0000  | 0.0000  | 0.0000  | 0.0226  | 0.0000  |         |             |           |
| 373-15b                 | 0.2426     | 0.2337  | 0.0787  | 0.1663  | 0.1712  | 0.1308  | 0.1767  | 0.1204  | 0.1346  | 0.1241  | 0.1380  | 0.0000  |         |             |           |
| 373-15c                 | 0.0000     | 0.0000  | 0.0000  | 0.0000  | 0.0000  | 0.0000  | 0.0413  | 0.1523  | 0.0000  | 0.1298  | 0.1851  | 0.0000  |         |             |           |
| 357-16a                 | 0.0143     | 0.0290  | 0.0068  | 0.0000  | 0.0000  | 0.0000  | 0.0000  | 0.0000  | 0.0000  | 0.0352  | 0.0441  | 0.0000  |         |             |           |
| 313-16b                 | 0.0000     | 0.0000  | 0.0000  | 0.0103  | 0.0173  | 0.0000  | 0.1367  | 0.2006  | 0.1009  | 0.0917  | 0.0711  | 0.0000  |         |             |           |
| 361-17a                 | 0.0000     | 0.0962  | 0.0000  | 0.0236  | 0.0454  | 0.0265  | 0.0000  | 0.0000  | 0.0163  | 0.0000  | 0.0000  | 0.0000  |         |             |           |
| 361-17b                 | 0.0000     | 0.0000  | 0.0000  | 0.0256  | 0.0333  | 0.0000  | 0.0154  | 0.0000  | 0.0203  | 0.0000  | 0.0000  | 0.0000  |         |             |           |
| 331-18a                 | 0.0000     | 0.0000  | 0.0000  | 0.0396  | 0.0435  | 0.0000  | 1.2613  | 2.0983  | 1.0447  | 0.1981  | 0.1158  | 0.0686  |         |             |           |
| 331-18b                 | 1.1828     | 0.8041  | 0.3370  | 0.7599  | 0.4643  | 0.3771  | 0.5084  | 0.7992  | 0.2322  | 0.6126  | 0.6776  | 0.7082  |         |             |           |
| 331-18d                 | 0.1087     | 0.2432  | 0.1558  | 0.0392  | 0.0670  | 0.0908  | 0.0543  | 0.0713  | 0.0000  | 0.0810  | 0.2207  | 0.0000  |         |             |           |
| 375-19a                 | 0.0087     | 0.0094  | 0.0000  | 0.0000  | 0.0000  | 0.0000  | 0.0000  | 0.0191  | 0.0000  | 0.5218  | 0.3494  | 0.0000  |         |             |           |
| 375-19b                 | 0.0209     | 0.0123  | 0.0000  | 0.0000  | 0.0000  | 0.0000  | 0.0000  | 0.0000  | 0.0000  | 0.0000  | 0.0030  | 0.0000  |         |             |           |
| 375-19c                 | 0.0234     | 0.0210  | 0.0000  | 0.0000  | 0.0000  | 0.0000  | 0.0000  | 0.0000  | 0.0000  | 0.0042  | 0.0057  | 0.0000  |         |             |           |

**Supplementary Figure 1: Phytocannabinoid analysis of the *Cannabis* extracts.** ECI-LC/MS phytocannabinoid profiling of the *Cannabis* extracts which were prepared as described in Materials and Methods in the main text. *Cannabis* extracts were ordered into clusters according to cannabinoid content (% w/w) in each extract with values color-coded according to order of magnitude of concentration. Only cannabinoids identified at a concentration of at least 0.2 (%w/w) in at least one extract were included in this figure.

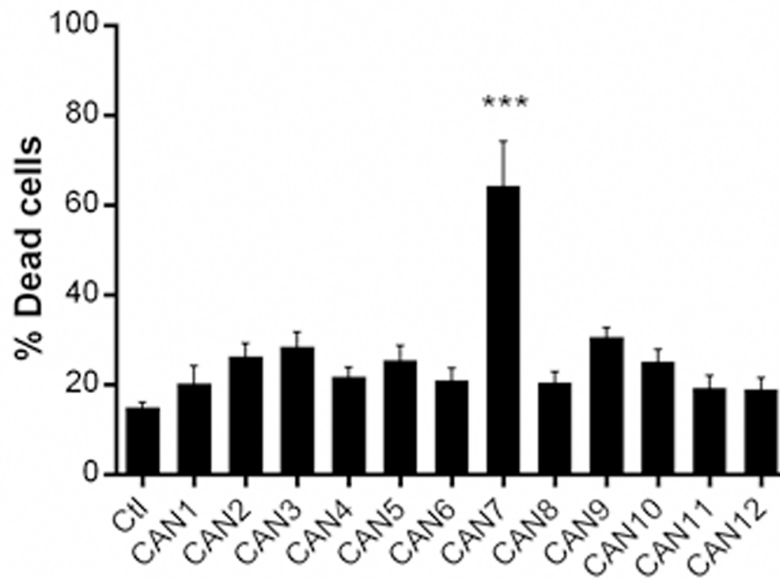

**Supplementary Figure 2: The effect of various *Cannabis* extracts on primary airway epithelial cells.** Normal primary epithelial cells were incubated for 24 hours incubation with or without (control) 4  $\mu\text{g/ml}$  of CAN1-CAN12. This was followed by the addition of Hoechst and PI and imaged by IXM Micro system, 20 $\times$  magnification. Live and dead cells were analyzed by the MetaXpress™ software, and data are reported as mean  $\pm$  SE of % dead cells out of total cells (N=3). Asterisks indicate statistical difference compared to control (\* $P$ <0.05, one-way ANOVA).

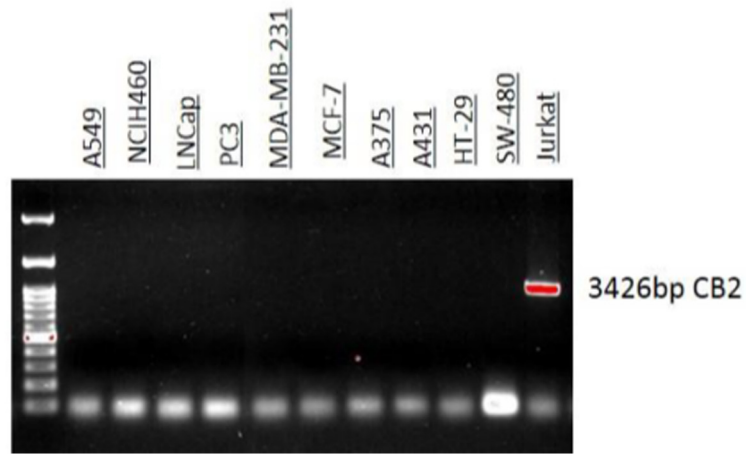

**Supplementary Figure 3: Evaluation of CNR2 mRNA expression in ten different cancer cell lines.** CNR2 mRNA expression levels were evaluated by PCR, using cDNA. As described in Supplementary Materials.

|            | CAN23   | CAN19   | CAN20   | CAN21   | CAN24   | CAN25   | CAN5    | CAN13   | CAN26   | CAN17   | CAN14   | CAN16   | CAN7    | CAN18   |             |
|------------|---------|---------|---------|---------|---------|---------|---------|---------|---------|---------|---------|---------|---------|---------|-------------|
| THCA       | 1.1502  | 1.5803  | 0.6912  | 3.5042  | 4.1435  | 0.1274  | 0.3049  | 5.0325  | 0.4736  | 0.0000  | 0.1255  | 0.3122  | 0.0000  | 0.6908  | C - %w/w    |
| THC        | 46.0497 | 48.6068 | 52.1128 | 52.2002 | 53.2992 | 56.1284 | 56.5847 | 56.5917 | 57.3547 | 60.9241 | 62.2031 | 63.1325 | 67.8032 | 81.7029 | C<0.02      |
| THCA-C4    | 0.0000  | 0.0000  | 0.0000  | 0.0128  | 0.0198  | 0.0000  | 0.0000  | 0.0213  | 0.0000  | 0.0000  | 0.0000  | 0.0000  | 0.0000  | 0.0000  | 0.02<C<0.1% |
| THC-C4     | 0.1160  | 0.1188  | 0.1696  | 0.1184  | 0.1498  | 0.0000  | 0.1085  | 0.1196  | 0.1278  | 0.1720  | 0.2003  | 0.2159  | 0.1969  | 0.1275  | 0.1%<C<1%   |
| THCVA      | 0.0213  | 0.0000  | 0.0000  | 0.0452  | 0.0532  | 0.0000  | 0.0000  | 0.0552  | 0.0000  | 0.0000  | 0.0000  | 0.0000  | 0.0000  | 0.0000  | 1%<C<10%    |
| THCV       | 0.3933  | 0.2408  | 0.4409  | 0.3724  | 0.3426  | 0.2343  | 0.2072  | 0.2938  | 0.3090  | 0.4601  | 0.4692  | 0.4479  | 0.6137  | 0.4426  | 10%<C<30%   |
| THCOA      | 0.0000  | 0.0000  | 0.0000  | 0.0132  | 0.0134  | 0.0000  | 0.0000  | 0.0255  | 0.0000  | 0.0000  | 0.0000  | 0.0000  | 0.0000  | 0.0000  | C>30%       |
| CBDA       | 0.0917  | 0.0109  | 0.0270  | 0.0546  | 0.0379  | 0.0089  | 0.0000  | 0.0665  | 0.0246  | 0.0000  | 0.0175  | 0.0750  | 0.0000  | 0.0285  |             |
| CBD        | 0.7689  | 0.1115  | 0.1174  | 0.0846  | 0.0964  | 0.1240  | 0.2125  | 0.1095  | 0.1204  | 0.1325  | 0.1679  | 0.3280  | 0.2107  | 0.1598  |             |
| CBGA       | 0.1783  | 0.1988  | 0.2964  | 1.1113  | 0.4298  | 0.1016  | 0.0725  | 0.2913  | 0.2919  | 0.0579  | 0.0595  | 0.1588  | 0.2240  | 0.4754  |             |
| CBG        | 1.3528  | 1.7086  | 1.1200  | 1.7429  | 1.1701  | 0.9061  | 4.4623  | 0.8703  | 1.4233  | 1.6082  | 0.6369  | 1.0870  | 12.6179 | 2.2239  |             |
| CBGA-C4    | 0.0116  | 0.0077  | 0.0076  | 0.0151  | 0.0192  | 0.0094  | 0.0408  | 0.0272  | 0.0102  | 0.0000  | 0.0000  | 0.0132  | 0.0362  | 0.0148  |             |
| Sesqui-CBG | 0.0246  | 0.0248  | 0.0114  | 0.0154  | 0.0404  | 0.0320  | 0.0340  | 0.0292  | 0.0594  | 0.0280  | 0.0336  | 0.0525  | 0.0160  | 0.0275  |             |
| CBCA       | 0.0376  | 0.0305  | 0.0466  | 0.1657  | 0.0991  | 0.0273  | 0.0060  | 0.1257  | 0.0378  | 0.0215  | 0.0274  | 0.0435  | 0.0061  | 0.0721  |             |
| CBC        | 1.1255  | 0.8699  | 0.6844  | 0.7319  | 0.7240  | 0.7091  | 1.0927  | 0.4670  | 0.5878  | 0.8653  | 0.6813  | 0.6439  | 0.8269  | 1.0350  |             |
| CBNA       | 0.0550  | 0.0334  | 0.1016  | 0.1903  | 0.0788  | 0.0000  | 0.0121  | 0.1660  | 0.0236  | 0.0000  | 0.0296  | 0.0229  | 0.0000  | 0.0617  |             |
| CBN        | 1.6068  | 0.5138  | 2.4148  | 0.4405  | 0.5195  | 0.4269  | 2.7877  | 0.6746  | 0.6110  | 0.5453  | 1.5265  | 0.6243  | 1.0339  | 1.5517  |             |
| CBNV       | 0.0142  | 0.0000  | 0.0207  | 0.0024  | 0.0023  | 0.0000  | 0.0083  | 0.0029  | 0.0000  | 0.0036  | 0.0117  | 0.0043  | 0.0096  | 0.0082  |             |
| CBL        | 0.0000  | 0.0000  | 0.0000  | 0.0000  | 0.0000  | 0.0000  | 0.0458  | 0.0000  | 0.0000  | 0.0000  | 0.0000  | 0.0000  | 0.0000  | 0.0000  |             |
| CBTA-1     | 0.0160  | 0.0194  | 0.0068  | 0.0237  | 0.0406  | 0.0000  | 0.0166  | 0.0340  | 0.0000  | 0.0000  | 0.0000  | 0.0000  | 0.0000  | 0.0050  |             |
| CBT-1      | 2.2479  | 1.6424  | 1.7820  | 2.3609  | 2.1782  | 1.1004  | 4.1060  | 2.5065  | 1.2334  | 0.9925  | 1.2721  | 1.3111  | 3.3258  | 1.8195  |             |
| CBTV-1     | 0.0175  | 0.0000  | 0.0139  | 0.0152  | 0.0000  | 0.0000  | 0.0000  | 0.0000  | 0.0000  | 0.0000  | 0.0000  | 0.0000  | 0.0295  | 0.0000  |             |
| CBT-3      | 0.8889  | 0.7212  | 1.3833  | 0.5757  | 0.4832  | 0.6269  | 2.6390  | 0.6647  | 0.8046  | 0.3887  | 0.5495  | 0.5503  | 1.6640  | 1.9103  |             |
| 329-11b    | 0.0875  | 0.5470  | 0.1020  | 0.0522  | 0.0709  | 0.0409  | 0.1491  | 0.0748  | 0.0987  | 0.0358  | 0.1108  | 0.3803  | 0.1524  | 0.1389  |             |
| 329-11c    | 0.0000  | 0.0909  | 0.0000  | 0.0000  | 0.0000  | 0.0000  | 0.0000  | 0.0000  | 0.0000  | 0.0000  | 0.0000  | 0.0000  | 0.0170  | 0.0000  |             |
| 329-11d    | 0.5344  | 0.4950  | 0.3515  | 0.4551  | 0.4780  | 0.2922  | 1.1899  | 0.3604  | 0.2622  | 0.3361  | 0.4742  | 0.4629  | 0.7637  | 0.6024  |             |
| 329-11e    | 0.0400  | 0.0233  | 0.0350  | 0.0235  | 0.0456  | 0.0172  | 0.0843  | 0.0354  | 0.0206  | 0.0069  | 0.0478  | 0.0373  | 0.0554  | 0.0473  |             |
| 373-15b    | 0.2644  | 0.2457  | 0.0522  | 0.3520  | 0.3424  | 0.0885  | 0.1712  | 0.4375  | 0.1482  | 0.1348  | 0.2806  | 0.3367  | 0.1663  | 0.1918  |             |
| 373-15c    | 0.5388  | 0.1661  | 0.4819  | 0.3271  | 0.1323  | 0.0000  | 0.0000  | 0.2561  | 0.2482  | 0.0000  | 0.1311  | 0.3467  | 0.0000  | 0.0000  |             |
| 361-17a    | 0.2379  | 0.0497  | 0.2154  | 0.0819  | 0.0544  | 0.0297  | 0.0454  | 0.1339  | 0.0764  | 0.0000  | 0.1601  | 0.0484  | 0.0236  | 0.1958  |             |
| 361-17b    | 0.0649  | 0.0211  | 0.0458  | 0.0283  | 0.0256  | 0.0265  | 0.0333  | 0.0511  | 0.0346  | 0.0177  | 0.0404  | 0.0266  | 0.0256  | 0.0764  |             |
| 331-18a    | 0.0437  | 0.0158  | 0.0192  | 0.0148  | 0.0163  | 0.0215  | 0.0435  | 0.0201  | 0.0212  | 0.0184  | 0.0259  | 0.0267  | 0.0396  | 0.0331  |             |
| 331-18b    | 0.3667  | 0.7235  | 0.2291  | 0.7731  | 0.7236  | 0.3291  | 0.4643  | 0.6252  | 0.6119  | 0.0000  | 0.0000  | 0.8514  | 0.7599  | 0.8409  |             |
| 331-18d    | 0.0558  | 0.1570  | 0.1614  | 0.0924  | 0.0000  | 0.1497  | 0.0670  | 0.1388  | 0.1024  | 0.0000  | 0.0349  | 0.0000  | 0.0392  | 0.1833  |             |

**Supplementary Figure 4: Phytocannabinoid analysis of the *Cannabis* extracts.** ECI-LC/MS phytocannabinoid profiling of 14  $\Delta^9$ -THC-rich *Cannabis* extracts which were prepared as described in Materials and Methods. *Cannabis* extracts are ordered by increasing content of  $\Delta^9$ -THC (% w/w) in each extract with values color-coded according to concentration order of magnitude of concentration. Only cannabinoids identified at a concentration of at least 0.2 (%w/w) in at least one extract were included in this figure.

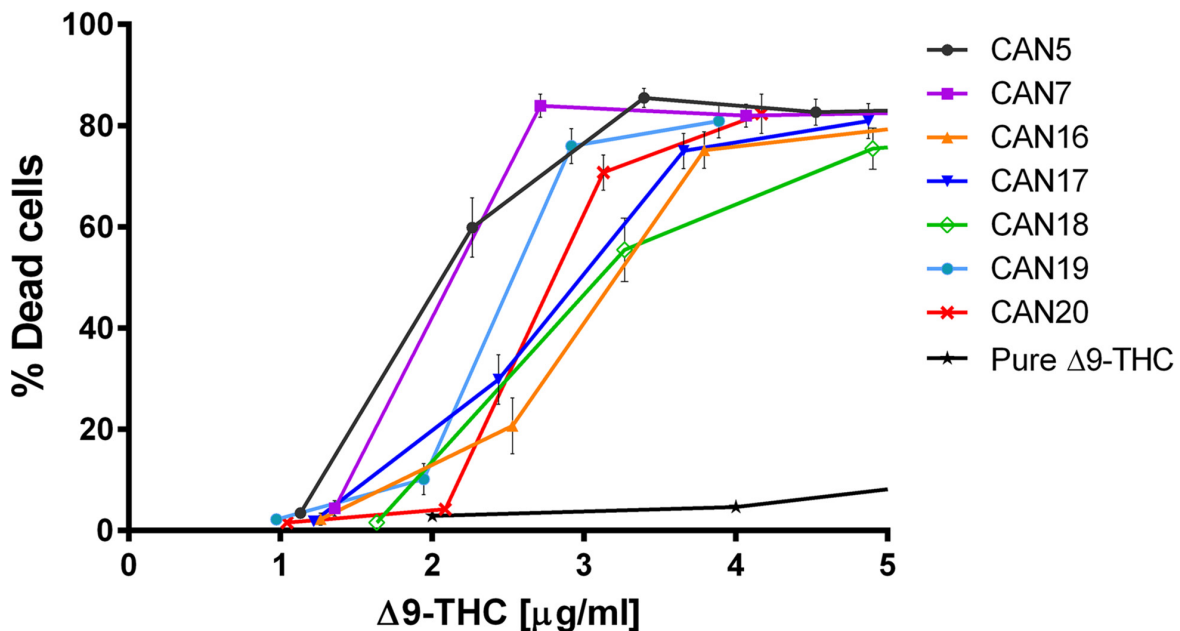

**Supplementary Figure 5: The effect of different high  $\Delta^9$ -THC extracts on the survival of A549 cells.** A dose-response curve of A549 cells after 24 h incubation with 2-10  $\mu\text{g/ml}$  of seven high- $\Delta^9$ -THC *Cannabis* extracts or pure  $\Delta^9$ -THC, according to  $\Delta^9$ -THC concentration in each extract. Data are reported as mean  $\pm$  SE of % dead cells out of total cells (N=5).

**Supplementary Table 1: Effect of *Cannabis* extracts on the survival of cancer cell lines**

|                     | A549        | NCIH460     | PC3         | LNcAP       | HT29 | SW480       | A431        | A375        | MDA231      | MCF7        | U87MG       | T98G        |
|---------------------|-------------|-------------|-------------|-------------|------|-------------|-------------|-------------|-------------|-------------|-------------|-------------|
| CAN1                | >10         | >10         | >10         | 7.91 ± 0.75 | >10  | >10         | >10         | >10         | >10         | >10         | >10         | >10         |
| CAN2                | 3.89 ± 0.17 | 4.61 ± 0.57 | 6.07 ± 0.36 | 5.99 ± 0.19 | >10  | 3.92 ± 0.36 | 6.26 ± 0.33 | 4.75 ± 0.16 | 3.57 ± 0.36 | 7.04 ± 0.31 | 3.32 ± 0.14 | 3.18 ± 0.25 |
| CAN3                | 7.43 ± 0.15 | 7.88 ± 0.56 | 9.39 ± 0.22 | >10         | >10  | 6.33 ± 0.39 | 9.16 ± 0.44 | 7.82 ± 0.30 | 5.74 ± 0.47 | >10         | 5.94 ± 0.20 | 5.12 ± 0.21 |
| CAN4                | 5.84 ± 0.20 | 6.59 ± 0.39 | 7.86 ± 0.22 | 4.44 ± 0.35 | >10  | 6.16 ± 0.50 | 8.92 ± 0.39 | 6.75 ± 0.20 | 7.35 ± 0.52 | >10         | 7.55 ± 0.42 | 6.69 ± 0.28 |
| CAN5                | 3.65 ± 0.19 | 4.68 ± 0.77 | 5.94 ± 0.22 | 6.22 ± 0.27 | >10  | 3.70 ± 0.39 | 5.90 ± 0.45 | 4.97 ± 0.21 | 4.54 ± 0.17 | 6.21 ± 0.23 | 4.16 ± 0.13 | 3.53 ± 0.20 |
| CAN6                | 8.30 ± 0.21 | 7.70 ± 0.63 | 9.14 ± 0.18 | 4.29 ± 0.35 | >10  | 5.75 ± 0.43 | >10         | 7.92 ± 0.34 | 8.35 ± 0.55 | >10         | >10         | 8.54 ± 0.41 |
| CAN7                | 3.06 ± 0.18 | 4.11 ± 0.81 | 3.85 ± 0.41 | 5.21 ± 0.30 | >10  | 3.71 ± 0.38 | 5.74 ± 0.42 | 4.51 ± 0.33 | 3.24 ± 0.19 | 5.11 ± 0.21 | 2.97 ± 0.13 | 3.07 ± 0.17 |
| CAN8                | >10         | >10         | >10         | 7.34 ± 0.60 | >10  | >10         | >10         | >10         | >10         | >10         | >10         | >10         |
| CAN9                | 4.90 ± 0.14 | 5.17 ± 0.55 | 6.36 ± 0.28 | 7.77 ± 0.42 | >10  | 4.42 ± 0.30 | 6.99 ± 0.30 | 4.92 ± 0.20 | 3.90 ± 0.31 | 8.11 ± 0.47 | 3.71 ± 0.15 | 3.25 ± 0.17 |
| CAN10               | 4.33 ± 0.15 | 4.92 ± 0.42 | 5.69 ± 0.33 | 6.03 ± 0.20 | >10  | 4.81 ± 0.53 | 9.96 ± 0.58 | 4.97 ± 0.36 | 3.77 ± 0.27 | 7.82 ± 0.59 | 3.64 ± 0.13 | 3.15 ± 0.22 |
| CAN11               | >10         | >10         | >10         | 7.39 ± 0.53 | >10  | >10         | >10         | >10         | >10         | >10         | >10         | >10         |
| CAN12               | 6.85 ± 0.15 | 8.04 ± 0.48 | 8.92 ± 0.11 | >10         | >10  | 7.01 ± 0.48 | 9.23 ± 0.48 | 8.35 ± 0.31 | 8.64 ± 1.13 | >10         | 6.39 ± 0.12 | 6.40 ± 0.16 |
| Δ <sup>9</sup> -THC | 7.37 ± 0.18 | 7.73 ± 1.02 | >10         | >10         | >10  | 9.94 ± 0.82 | 9.41 ± 1.14 | 9.23 ± 0.96 | 7.24 ± 0.32 | >10         | 6.08 ± 0.29 | 6.23 ± 0.35 |

Various cancer cell lines were treated with (2-10 µg/ml) concentrations of *Cannabis* extracts and 2-10 µg/ml of pure Δ<sup>9</sup>-THC for 24 h. Cells were imaged via ImageXpress Micro XLS (20× magnification) after adding Hoechst and PI dyes to differentiate between live and dead cells. The number of live and dead cells were analyzed by MetaXpress® software. Data are reported as mean ± S.E. of LC50 values (µg/ml) (n ≥ 5).

**Supplementary Table 2: Correlation between phytocannabinoid content and LC50 values of 14  $\Delta^9$ -THC-rich extracts on the A549 cell line**

| <b>Cannabinoid</b> | <b>r</b> | <b>p-value</b> | <b>Adjusted p-value</b> |
|--------------------|----------|----------------|-------------------------|
| <b>CBG</b>         | 0.6664   | 0.0002         | 0.0031                  |
| <b>CBT-3</b>       | 0.4621   | 0.0045         | 0.0582                  |
| <b>THC</b>         | 0.4553   | 0.0049         | 0.0582                  |
| <b>329-11d</b>     | 0.4346   | 0.0062         | 0.0677                  |
| <b>373-15c</b>     | 0.3237   | 0.0198         | 0.1976                  |
| <b>CBC</b>         | 0.2995   | 0.0250         | 0.2246                  |
| <b>CBT-1</b>       | 0.2151   | 0.0540         | 0.4316                  |
| <b>THCA</b>        | 0.1805   | 0.0729         | 0.5103                  |
| <b>THCV</b>        | 0.1335   | 0.1087         | 0.6521                  |
| <b>CBN</b>         | 0.0712   | 0.1831         | 0.9154                  |
| <b>331-18b</b>     | -0.0383  | 0.4847         | 1.0000                  |
| <b>CBD</b>         | -0.0416  | 0.5011         | 1.0000                  |
| <b>CBGA</b>        | -0.0689  | 0.6940         | 1.0000                  |
| <b>329-11b</b>     | -0.0798  | 0.8470         | 1.0000                  |

r- Pearson correlation coefficient, adjusted p-value is according to the Holm-Bonferroni correction method for multiple tests.
